# Supplementary material
Source: ML conference proceedings conference paper supplement (https://proceedings.mlr.press/v130/reddi21a.html)
Supplement: Supplementary file 1 [file reddi21a-supp.pdf]

## Appendix for RANKDISTIL: Knowledge Distillation for Ranking

### A Coupled RANKDISTIL Algorithm

We describe the full algorithm for coupled RANKDISTIL in this section. As mentioned earlier, computing the gradient of coupled RANKDISTIL-LOSS in Equation 3 can be expensive since it requires iterating over all the permutations. Here, we use a Monte-Carlo approximation to obtain an unbiased estimate of the gradient. Algorithm 2 lists the pseudo-code for the algorithm. Note that the algorithm is with Monte-Carlo approximation on single permutation, however, in practice we use a batch of permutations.

---

#### Algorithm 2 Coupled RANKDISTIL

---

Initialization: Initial predictor  $f$ , Teacher predictor  $f^t$ , distribution  $Q(\cdot|t)$ , loss function  $\ell_{\text{RANKDISTIL}}$ , integer  $p \geq k$ , batch size  $m$ , mined batch size  $b \leq m$ , thresholding function  $\tau$

**for**  $r = 0, \dots, R - 1$  **do**

Uniformly randomly select an example  $\{x, y\}$

Sample index set  $B$  of size  $m$  using the distribution  $Q(\cdot|f^t(x))$

Compute  $P = \text{TOP}_p(f^t(x))$  and  $N = \text{TOP}_{b,B}(f(x))$

Compute  $s_l = f_l(x)$  for  $l \in P \cup N$

Randomly sample a permutation  $\pi$  according to  $r$ -Plackett's model  $\mathbb{P}_{\tau(\alpha t, P)}(\cdot|P \cup N)$

Compute gradient  $g_r = -\nabla \log \mathbb{P}_s(\pi|P \cup N)$  (according to Definition 4)

Update predictor  $f$  using the gradient  $g_r$

**end for**

---

#### A.1 Proof of Proposition 5

Recall that

$$\mathbb{P}_s(\pi|S) = \frac{1}{(|S| - r)!} \prod_{j=1}^r \frac{\exp(s_{\pi(j)})}{\sum_{l=j}^{|S|} \exp(s_{\pi(l)})}.$$

To prove the first part of the result, we observe the following:

$$\sum_{\pi \in \mathcal{P}(S)} \mathbb{P}_s(\pi|S) = \sum_{\pi \in \mathcal{P}(S)} \frac{1}{(|S| - r)!} \prod_{j=1}^r \frac{\exp(s_{\pi(j)})}{\sum_{l=j}^{|S|} \exp(s_{\pi(l)})}.$$

Let  $\mathcal{G}_l$  be the set of permutations of  $l$  elements selected from  $S$ . Then, it is easy to see that

$$\sum_{\pi \in \mathcal{P}(S)} \mathbb{P}_s(\pi|S) = \sum_{\pi \in \mathcal{P}(S)} \frac{1}{(|S| - r)!} \prod_{j=1}^r \frac{\exp(s_{\pi(j)})}{\sum_{l=j}^{|S|} \exp(s_{\pi(l)})} = \sum_{\pi \in \mathcal{G}_r} \prod_{j=1}^r \frac{\exp(s_{\pi(j)})}{\sum_{l=j}^{|S|} \exp(s_{\pi(l)})}$$

This can be shown by using the principle of mathematical induction on size of  $\mathcal{G}_r$ . It is easy to see that it holds for all subsets of size 1. Suppose it holds for all subsets of size  $r - 1$ . For any permutation  $\pi$ , we use  $\{\pi\}$  to denote the set of all items in  $\pi$ . We consider the following:

$$\begin{aligned} \sum_{\pi \in \mathcal{G}_r} \prod_{j=1}^r \frac{\exp(s_{\pi(j)})}{\sum_{l=j}^{|S|} \exp(s_{\pi(l)})} &= \sum_{\pi \in \mathcal{G}_{r-1}} \prod_{j=1}^{r-1} \frac{\exp(s_{\pi(j)})}{\sum_{l=j}^{|S|} \exp(s_{\pi(l)})} \sum_{i \in S - \{\pi\}} \frac{\exp(s_i)}{\sum_{l \in S - \{\pi\}} \exp(s_{\pi(l)})} \\ &= \sum_{\pi \in \mathcal{G}_{r-1}} \prod_{j=1}^{r-1} \frac{\exp(s_{\pi(j)})}{\sum_{l=j}^{|S|} \exp(s_{\pi(l)})} = 1. \end{aligned}$$

The second equality follows from the induction hypothesis. Therefore, it also holds for all size  $r \leq K$ . The base case for  $r = 1$  is easy to verify. The result follows by principle of mathematical induction.

## A.2 Computation of Coupled RANKDISTIL-LOSS

For the purpose of the discussion, let us assume  $M = \infty$ . Coupled RANKDISTIL-LOSS can be computed in  $O(p^r r)$ . Recall that coupled RANKDISTIL-LOSS is

$$\ell_{\text{RANKDISTIL}}(t, s, P, N) = - \sum_{\pi \in \mathcal{P}(P \cup N)} \mathbb{P}_{\tau(\alpha t, P)}(\pi | P \cup N) \log \mathbb{P}_s(\pi | P \cup N).$$

First note that we only have to consider permutations where items in  $N$  appear in the last  $|N|$  positions. This is due to the fact that  $\mathbb{P}_{\tau(\alpha t, P)}(\pi | P \cup N) = 0$  when  $N$  appear in the last  $|N|$  positions due to the thresholding function  $\tau$ . Furthermore, only the first  $r$  positions of the permutation are important. In particular,

$$\mathbb{P}_{\tau(\alpha t, P)}(\pi_1 | P \cup N) \log \mathbb{P}_s(\pi_1 | P \cup N) = \mathbb{P}_{\tau(\alpha t, P)}(\pi_2 | P \cup N) \log \mathbb{P}_s(\pi_2 | P \cup N)$$

when first  $r$  positions of the  $\pi_1$  and  $\pi_2$  are the same. The number of such unique permutations is  $O(p^r)$ . The time complexity for computing the loss for a permutation can be reduced to  $O(r)$  if  $\sum_{i \in N} e^{s_i}$  is computed beforehand. This can be obtained by computing  $\sum_{i \in P \cup N} e^{s_i}$  once and reusing them during the loss computation.

## B Example Instantiations of RANKDISTIL

We list a few interesting instantiations of RANKDISTIL-LOSS in this section.

### Binary RANKDISTIL-LOSS

- Sigmoid CE + logistic

$$\ell_{\text{RANKDISTIL}}(t, s, P, N) = \sum_{i \in P} \sum_{z \in \{-1, 1\}} \left\{ -\frac{1}{1 + e^{-zt_i}} \log \frac{1}{1 + e^{-zs_i}} \right\} + \sum_{i \in N} \log(1 + e^{s_i})$$

- Softmax CE + Logistic

$$\ell_{\text{RANKDISTIL}}(t, s, P, N) = \sum_{i \in P} \left\{ -\frac{e^{t_i}}{\sum_{i \in P} e^{t_i}} \log \frac{e^{s_i}}{\sum_{i \in P} e^{s_i}} \right\} + \sum_{i \in N} \log(1 + e^{s_i})$$

- 2-Regression + Square Hinge

$$\ell_{\text{RANKDISTIL}}(t, s, P, N) = \|t_P - s_P\|^2 + \sum_{i \in N} \max\{0, \gamma + s_i\}^2$$

### Pairwise RANKDISTIL-LOSS

- Softmax CE + Pairwise Hinge

$$\ell_{\text{RANKDISTIL}}(t, s, P, N) = \sum_{i \in P} \left\{ -\frac{e^{t_i}}{\sum_{i \in P} e^{t_i}} \log \frac{e^{s_i}}{\sum_{i \in P} e^{s_i}} \right\} + \sum_{i \in N} \sum_{j \in P} \max\{0, \gamma + s_i - s_j\}$$

- Pairwise Hinge + Pairwise Hinge

$$\ell_{\text{RANKDISTIL}}(t, s, P, N) = \sum_{i \neq j \in P} \sum_{z \in \{-1, 1\}} \mathbf{1}(z(t_i - t_j)) \max\{0, \gamma + z(s_j - s_i)\} + \sum_{i \in N} \sum_{j \in P} \max\{0, \gamma + s_i - s_j\}$$

- Pairwise Logistic + Pairwise Logistic

$$\ell_{\text{RANKDISTIL}}(t, s, P, N) = \sum_{i \neq j \in P} \sum_{z \in \{-1, 1\}} \mathbf{1}(z(t_i - t_j)) \log(1 + e^{z(s_j - s_i)}) + \sum_{i \in N} \sum_{j \in P} \log(1 + e^{s_i - s_j})$$

## C Consistency results

### C.1 Proof of Claim 3

The proof of Claim 3 follows easily from Definition 2. First note that  $[s^*(x)]_{[p+1]} < [s^*(x)]_{[p]}$ . Furthermore,  $p \geq k$  and  $\operatorname{argmax}_i s^*(x) = \operatorname{argmax}_i f^t(x)$  for all  $i \in [p]$ . Thus, it follows that the items in top- $k$  of  $s^*(x)$  and  $f^t(x)$  are exactly the same (including the order according to the respective scores). Since  $f^t$  is  $k$ -compatible, the result follows.

### C.2 Proof of Theorem 6

We provide the proof for the case where  $b = m$  in Algorithm 2. The proof for  $b < m$  is similar. First, recall that RANKDISTIL-LOSS is

$$\ell_d(t, s) = \mathbb{E}_{B \sim Q(\cdot|t)} \left[ \ell_{\text{RANKDISTIL}}(t, s, \text{TOP}_p(t), \text{TOP}_{b,B}(s)) \right],$$

where

$$\ell_{\text{RANKDISTIL}}(t, s, P, N) = \mathbb{E}_{\pi \sim \mathbb{P}_{\tau(\alpha t, P)}(\cdot|P \cup N)} [-\log \mathbb{P}_s(\pi|P \cup N)]$$

Note that  $P$  is always  $\text{TOP}_p(t)$ . We choose  $M$  such that  $[f^t(x)]_i \geq -M$  for all  $i \in [K]$ . Let us analyze a minimizer  $\bar{s} \in \operatorname{argmin}_s \ell_{\text{RANKDISTIL}}(t, s, P, N)$  for a particular a  $N \subseteq [K] - \text{TOP}_p(t)$ . We claim that  $\bar{s}_N = -\alpha M$  and  $\bar{s}_P = \alpha t_P$ . This is obtained from the fact that minimizer of the cross-entropy  $\ell_{\text{RANKDISTIL}}(t, s, P, N)$  is when the scores match (this can be easily verified by finding point such that  $\nabla \ell_{\text{RANKDISTIL}}(t, s, P, N) = 0$ ). Let  $s^*$  such that  $s^*_P = \alpha t_P$  and  $s^*_{K-\text{TOP}_p(t)} = -\alpha M$  then  $s^* \in \operatorname{argmin}_s \ell_{\text{RANKDISTIL}}(t, s, P, N)$  for all  $N \subseteq [K]$ . Therefore, by Lemma 9,  $s^* \in \operatorname{argmin}_s \ell_d(t, s)$ , which completes the proof.

### C.3 Proof of Theorem 7

We provide the proof for the case where  $b = m$  in Algorithm 1. The proof for  $b < m$  is similar. Since the  $\ell_{\text{RANKDISTIL}}$  in binary RANKDISTIL-LOSS case is separable in  $P$  and  $N$ , RANKDISTIL-LOSS can be written as

$$\ell_d(t, s) = \Psi(t, s, \text{TOP}_p(t)) + \mathbb{E}_{B \sim Q(\cdot|t)} \sum_{i \in B} \varphi(-s_i)$$

From the above form, it is easy to see that  $s_i^* \leq \gamma$  for all  $i \notin \text{TOP}_p(t)$  since  $\varphi$  is strictly decreasing in  $(-\infty, -\gamma]$  and  $\operatorname{supp}(Q(\cdot|t)) = [K] - \text{TOP}_p(t)$ . Furthermore,  $\operatorname{argmax}_i s_P^* = \operatorname{argmax}_i f_P^t(x)$  for all  $x \in \mathcal{X}$ ,  $i \in [p]$  and  $[f^t(x)]_{[p]} > \gamma$ . Combining these facts gives us the desired result.

### C.4 Proof of Theorem 8

The proof is similar to the binary case. Similar to the binary case, we provide the proof for the case where  $b = m$  in Algorithm 1. The proof for  $b < m$  is similar. In the pairwise case, RANKDISTIL-LOSS can be written as

$$\ell_d(t, s) = \Psi(t, s, \text{TOP}_p(t)) + \mathbb{E}_{B \sim Q(\cdot|t)} \sum_{i \in B} \sum_{j \in \text{TOP}_p(t)} \varphi(s_j - s_i)$$

From the above form, it is easy to see that  $s_i^* < s_j^*$  for all  $i \notin \text{TOP}_p(t)$  and  $j \in \text{TOP}_p(t)$  since  $\varphi$  is strictly decreasing in  $(-\infty, 0]$  and  $\operatorname{supp}(Q(\cdot|t)) = [K] - \text{TOP}_p(t)$ . Also,  $\operatorname{argmax}_i s_P^* = \operatorname{argmax}_i f_P^t(x)$  for all  $x \in \mathcal{X}$ ,  $i \in [p]$ . Putting these facts together completes the proof for the result.

**Lemma 9.** *Suppose  $F(u) = \mathbb{E}_z[G(u, z)]$  where  $G : \mathbb{R}^K \times \mathcal{Z} \rightarrow \mathbb{R}$ . If  $u^* \in \operatorname{argmin}_u G(u, z)$  for all  $z \in \mathcal{Z}$ , then  $u^* \in \operatorname{argmin}_u F(u)$ .*

*Proof.* The result trivially follows from the definition of  $\operatorname{argmin}$ . □
